# Supplementary material
Source: Springer Nature journal article supplement (https://www.springermedizin.de/resource/supplementary/12885_2011_2988_MOESM5_ESM.pdf/9462468)

*CDH1* exon 9 missense mutations

D402H (Patient No. 27)

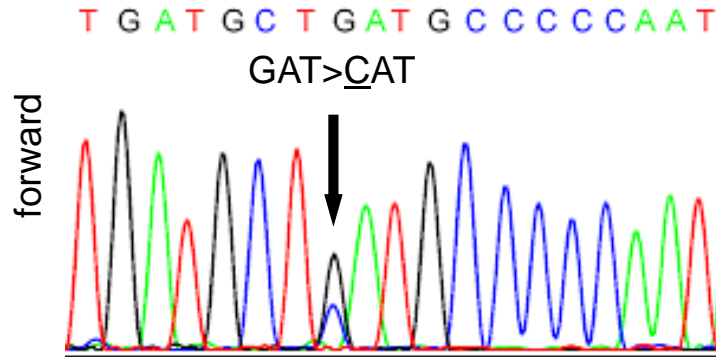

A408V (Patient No. 11)

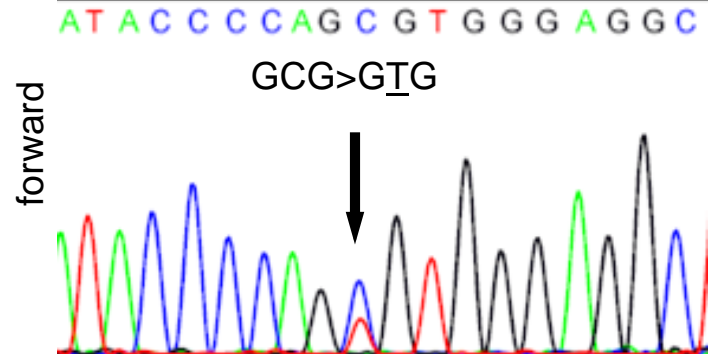

Supplement: MOESM5 [file 9462468]
